# Supplementary material
Source: HighWire-hosted journal article supplement (http://ajnr-stage2.highwire.org/highwire/filestream/71164/field_highwire_adjunct_files/0/19-00634.pdf)
Supplement: 19-00634.pdf [file 19-00634.pdf]

**On-line Table: Patients with aspartylglucosaminuria and their MR imaging findings**

| Patient              | Age (yr) | Sex      | SWI Findings, SI Decrease                                                                       | Other MR Imaging Findings                                                                                                                                                                                                               |
|----------------------|----------|----------|-------------------------------------------------------------------------------------------------|-----------------------------------------------------------------------------------------------------------------------------------------------------------------------------------------------------------------------------------------|
| 1                    | 7.4      | M        | Pulvinar ↓, anterior and medial nuclei ↓                                                        | T2 SI ↓ in thalami, mild T2 SI ↑ in deep and periventricular WM, frontotemporal areas of poor differentiation between GM and WM, thin CC, small pineal cyst                                                                             |
| 2                    | 7.9      | F        | Pulvinar ↓↓, anterior and medial nuclei ↓                                                       | T2 SI ↓ in thalami and ↓↓ in pulvinar, mild T2 SI ↑ in WM, FLAIR SI ↑ in periventricular WM, frontotemporal areas of poor differentiation between GM and WM, thin CC, small pineal cyst, CVI, mildly dilated PVSs                       |
| 3                    | 8.6      | M        | Pulvinar ↓, anterior and medial nuclei ↓                                                        | T2 SI ↓ in thalami and ↓↓ in pulvinar, T2 SI ↑ in deep and periventricular WM, FLAIR SI ↑ in periventricular WM, temporal areas of poor differentiation between GM and WM, thin CC, pineal cyst of 17 mm                                |
| 4                    | 8.8      | F        | Pulvinar ↓↓, anterior and medial nuclei ↓                                                       | T2 SI ↓ in thalami and ↓↓ in pulvinar, T2 SI ↑ in deep and periventricular WM, FLAIR SI ↑ periventricular WM, frontotemporal areas of poor differentiation between GM and WM, thin CC, mild cerebellar atrophy                          |
| 5                    | 9.5      | M        | Pulvinar ↓↓, anterior and medial nuclei ↓↓                                                      | T2 SI ↓ in thalami and ↓↓ in pulvinar, mild T2 SI ↑ in WM, FLAIR SI ↑ in periventricular WM, frontotemporal areas of poor differentiation between GM and WM, thin CC, small pineal cyst                                                 |
| 6                    | 11.4     | F        | Pulvinar ↓↓, anterior and medial nuclei ↓↓                                                      | T2 SI ↓ in thalami and ↓↓ in pulvinar, T2 SI ↑ in WM, FLAIR SI ↑ in periventricular WM, frontotemporal areas of poor differentiation between GM and WM, thin CC, pineal cyst of 15 mm, mildly dilated PVSs, MCM                         |
| 7                    | 11.4     | M        | Pulvinar ↓↓, anterior and medial nuclei ↓↓, globus pallidus medial aspect ↓                     | T2 SI ↓ in thalami and ↓↓ in pulvinar, T2 SI ↑ in WM, FLAIR SI ↑ in periventricular WM, frontotemporal areas of poor differentiation between GM and WM, rather thin CC                                                                  |
| 8                    | 11.5     | M        | Pulvinar ↓↓, anterior and medial nuclei ↓, globus pallidus medial aspect ↓, substantia nigra ↓  | T2 SI ↓ in thalami and ↓↓ in pulvinar, mild T2 SI ↑ in WM, mild FLAIR SI ↑ in periventricular WM, frontotemporal areas of poor differentiation between GM and WM, dilated PVSs                                                          |
| 9                    | 11.7     | F        | Pulvinar ↓↓, anterior and medial nuclei ↓, globus pallidus ↓, substantia nigra ↓                | T2 SI ↓ in thalami and ↓↓ in pulvinar, mild T2 SI ↑ in WM, mild FLAIR SI ↑ in periventricular WM, frontotemporal areas of poor differentiation between GM and WM, rather thin CC, dilated PVSs                                          |
| 10                   | 13.8     | M        | Pulvinar ↓↓, anterior and medial nuclei ↓↓, globus pallidus medial aspect ↓, substantia nigra ↓ | T2 SI ↓ in thalami and ↓↓ in pulvinar, mild T2 and FLAIR SI ↑ in deep WM, temporal areas of poor differentiation between GM and WM, thin CC, small pineal cyst, MCM                                                                     |
| 11                   | 14.2     | F        | Pulvinar ↓↓, anterior and medial nuclei ↓↓, globus pallidus medial aspect ↓, substantia nigra ↓ | T2 SI ↓ in thalami and ↓↓ in pulvinar, mild FLAIR ↑ in periventricular WM, temporal areas of poor differentiation between GM and WM, mild widening of cortical sulci, CVI                                                               |
| 12                   | 14.5     | F        | Pulvinar ↓↓, anterior and medial nuclei ↓↓                                                      | T2 SI ↓ in thalami and ↓↓ in pulvinar, mild T2 SI ↑ in deep WM, temporal areas of poor differentiation between GM and WM (some motion artifacts), thin CC, pineal cysts, mild dilation of lateral and third ventricles                  |
| 13                   | 15.0     | M        | Pulvinar ↓↓, anterior and medial nuclei ↓↓, globus pallidus medial aspect ↓, substantia nigra ↓ | T2 SI ↓ in thalami and ↓↓ in pulvinar, mild T2 SI ↑ in deep WM, mild FLAIR SI ↑ in periventricular and deep WM, temporal areas of poor differentiation between GM and WM, dilated PVSs in brain stem, rather thin CC, small pineal cyst |
| Mean age, 11.2 ± 2.5 |          | 6 F, 7 M |                                                                                                 |                                                                                                                                                                                                                                         |

**Note:**—↓ indicates mild decrease; ↓↓, marked decrease; ↑, increase; CVI, cavum veli interpositi; PVSs, perivascular spaces; MCM, mega cisterna magna; CC, corpus callosum.
